# Supplementary material for: Skilful probabilistic predictions of UK flood risk months ahead using a large-sample machine learning model trained on multimodel ensemble climate forecasts
Source: Copernicus journal article supplement (doi:10.5194/hess-29-2393-2025), 2025-06-10
Supplement: Supplementary file 1 [file hess-29-2393-2025-supplement.pdf]

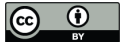

*Supplement of*

**Skilful probabilistic predictions of UK flood risk months ahead  
using a large-sample machine learning model trained on  
multimodel ensemble climate forecasts**

**Simon Moulds et al.**

*Correspondence to:* Simon Moulds ([simon.moulds@ed.ac.uk](mailto:simon.moulds@ed.ac.uk))

The copyright of individual parts of the supplement might differ from the article licence.

This file contains 3 tables (Tables S1—S3)

**Table S1:** S2S prediction systems used in the analysis.

| Forecast centre | Model     | Ensemble size |
|-----------------|-----------|---------------|
| NCEP            | CFSv2     | 28            |
| CMCC            | CMCC-CM2  | 40            |
| DWD             | GCFS2.1   | 30            |
| ECCC            | GEM5-NEMO | 10            |
| Met Office      | HadGEM3   | 25            |
| ECMWF           | SEAS5     | 28            |
| Météo-France    | System8   | 25            |
| JMA             | CPS3      | 10            |

**Table S2:** Dynamical predictor variables used in the ML models.

| Variable                 | Description                                                                                  |
|--------------------------|----------------------------------------------------------------------------------------------|
| Precipitation            | Reforecast precipitation (1994-2016)                                                         |
| Temperature              | Reforecast temperature (1994-2016)                                                           |
| Antecedent precipitation | Antecedent precipitation, drawn from forecasts of the month prior to the target month        |
| Antecedent streamflow    | Antecedent streamflow, drawn from observations of the month prior to forecast initialisation |

**Table S3:** Static catchment descriptors included in the multi-site model with catchment attributes. Median and range are computed from the subset of 580 basins used in our analysis. All indices were drawn from CAMELS-GB (Coxon et al., 2020). Median and range are given for the 579 catchments included in our study.

| Variable             | Description                                                               | Median | Range                   |
|----------------------|---------------------------------------------------------------------------|--------|-------------------------|
| area                 | Catchment area (km <sup>2</sup> )                                         | 157    | [2, 9931]               |
| elev_mean            | Mean elevation (masl)                                                     | 177    | [32, 682]               |
| dpsbar               | Slope of the catchment mean drainage path (m km <sup>-1</sup> )           | 86     | [11, 488]               |
| sand_perc            | Percent sand (%)                                                          | 43     | [19, 86]                |
| silt_perc            | Percent silt (%)                                                          | 30     | [9, 42]                 |
| clay_perc            | Percent clay (%)                                                          | 23     | [4, 50]                 |
| porosity_hypres      | Soil porosity from hypres pedotransfer function (-)                       | 46     | [32, 81]                |
| conductivity_hypres  | Soil conductivity from hypres pedotransfer function (cm h <sup>-1</sup> ) | 1.39   | [0.60, 3.13]            |
| soil_depth_pelletier | Depth to bedrock (m)                                                      | 1.23   | [0.6, 42]               |
| dwood_perc           | Percent cover of deciduous woodland (%)                                   | 6      | [0, 37]                 |
| ewood_perc           | Percent cover of evergreen woodland (%)                                   | 2      | [0, 93]                 |
| crop_perc            | Percent cover of cropland (%)                                             | 10     | [0, 88]                 |
| urban_perc           | Percent cover of urban (%)                                                | 3      | [0, 83]                 |
| reservoir_cap        | Reservoir capacity (ML)                                                   | 0      | [0, 8×10 <sup>7</sup> ] |
